# Supplementary material
Source: PubMed Central journal article supplement (PMC3198356)
Supplement: 1109615108_pnas.201109615SI.pdf [file 1109615108_pnas.201109615SI.pdf]

# Supporting Information

Gomes Rodrigues et al. 10.1073/pnas.1109615108

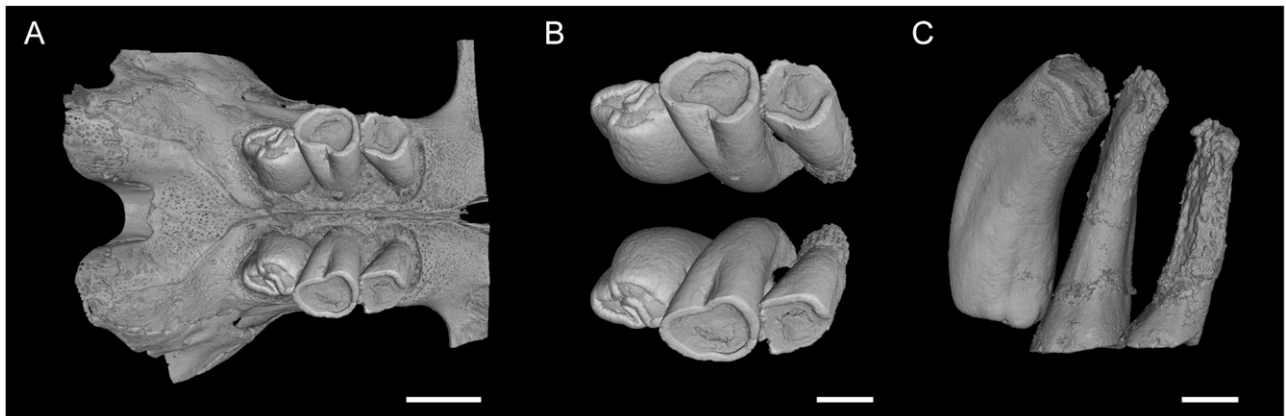

**Fig. S1.** X-ray synchrotron microtomographic 3D rendering of the upper dentition of a young specimen of *Heliophobius* (RMCA96.036-M-5462). RMCA, Royal Museum for Central Africa of Tervuren, Belgium. (A) Upper jugal teeth on skull (scale bar, 2 mm). (B) Upper jugal teeth extracted (scale bar, 1 mm). (C) Lingual view of right upper tooth row (scale bar, 1 mm).

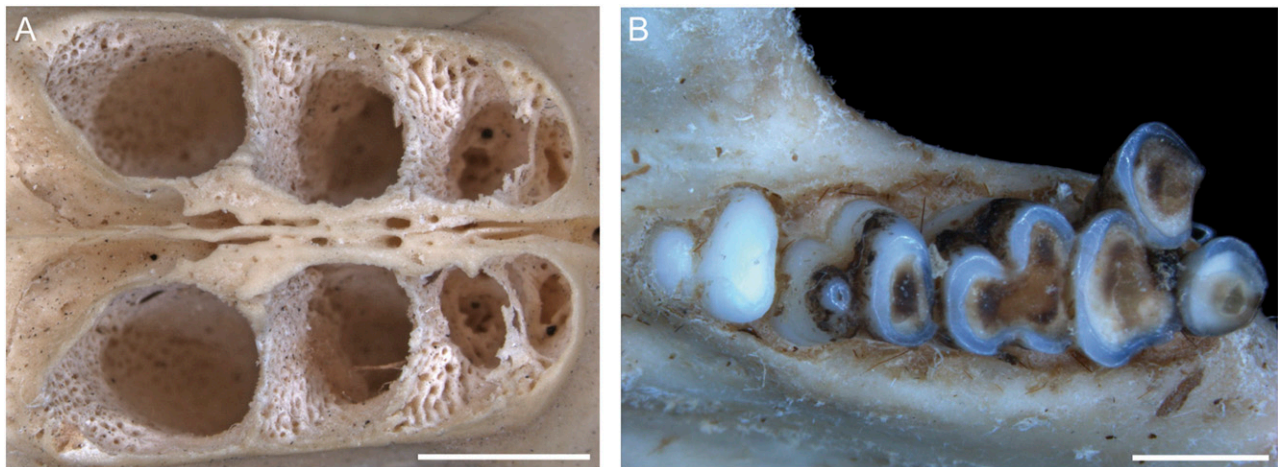

**Fig. S2.** Photographs showing a few consequences of mesial drift in *Heliophobius*. (A) Maxillae showing bone remodeling (RMCA8846-M). (B) Hemimandible with a misalignment of the second tooth (RMCA96.036-M-5459). (Scale bars, 2 mm.)

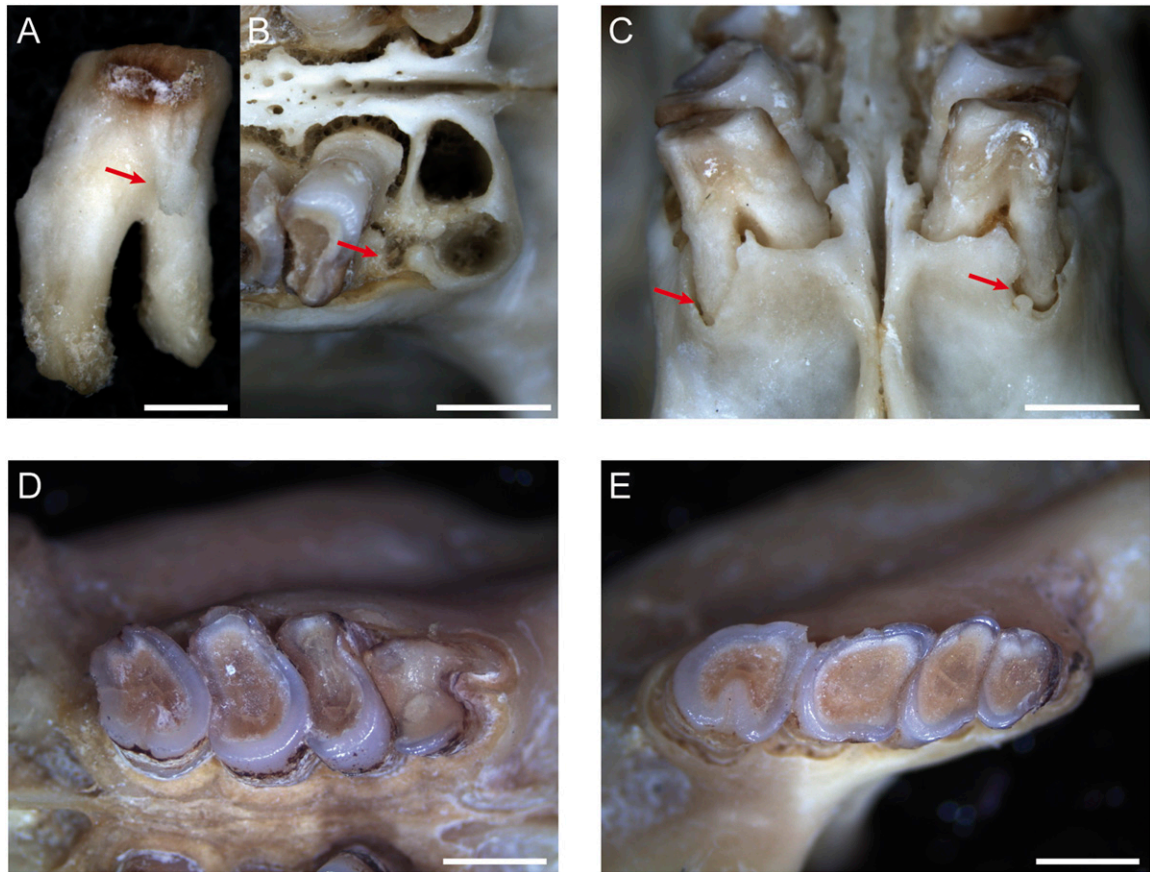

**Fig. 53.** Photographs showing consequences of a slight mesial drift and dental wear gradient in *Georychus*. (A) Upper fourth premolar showing the distal root partially resorbed as in manatees (MNHN-CG1988-111). (Scale bar, 1 mm.) MNHN, Museum National d'Histoire Naturelle, Paris. (B) Upper dentitions showing the bone socket of a distal root of a fourth premolar partially resorbed (MNHN-CG1988-111). (Scale bar, 2 mm.) (C) Upper dentition from a mesial view showing bone resorption (MNHN-CG1988-111). (Scale bar, 2 mm.) (D and E) Dental wear gradient on upper and lower dentitions (NHM66.6.16.2). NHM, National History Museum, London (Scale bars, 2 mm.) Red arrows indicate resorption.



Table S1. Cont.

| Institution | Specimen      | Left lower teeth |            |          | Right lower teeth |            |          | Left upper teeth |            |          | Right upper teeth |            |          | Skull length, mm |
|-------------|---------------|------------------|------------|----------|-------------------|------------|----------|------------------|------------|----------|-------------------|------------|----------|------------------|
|             |               | Erupting         | Functional | Worn out | Erupting          | Functional | Worn out | Erupting         | Functional | Worn out | Erupting          | Functional | Worn out |                  |
| RMCA        | 96.037-M-5643 | 1                | 4          | 0        | 1                 | 4          | 0        | 1                | 4          | 0        | 1                 | 4          | 0        | 34.5             |
| RMCA        | 96.037-M-5646 | 1                | 3          | 1        | 1                 | 3          | 1        | 1                | 3          | 1        | 1                 | 3          | 1        | 33.2             |
| RMCA        | 96.037-M-5648 | 1                | 4          | 1        | 1                 | 4          | 1        | 0                | 5          | 1        | 1                 | 5          | 0        | 35.3             |
| RMCA        | 96.037-M-5649 | 0                | 4          | 1        | 1                 | 4          | 1        | 1                | 4          | 1        | 1                 | 4          | 1        | 39.6             |
| RMCA        | 96.037-M-5658 | 0                | 4          | 0        | 0                 | 4          | 0        | 0                | 4          | 0        | 0                 | 4          | 0        | 31.0             |
| RMCA        | 96.037-M-5664 | 1                | 3          | 1        | 1                 | 4          | 0        | 1                | 4          | 0        | 1                 | 4          | 0        | 34.9             |
| RMCA        | 96.037-M-5676 | 1                | 4          | 0        | 1                 | 4          | 0        | 0                | 4          | 0        | 0                 | 4          | 0        | 34.1             |
| RMCA        | 96.037-M-5680 | 0                | 5          | 0        | 0                 | 5          | 0        | 1                | 4          | 1        | 1                 | 4          | 1        | 36.9             |
| RMCA        | 96.037-M-5681 | 0                | 4          | 0        | 0                 | 4          | 0        | 0                | 4          | 0        | 0                 | 3          | 1        | 31.9             |
| RMCA        | 96.037-M-5682 | 1                | 4          | 0        | 1                 | 3          | 1        | 1                | 4          | 1        | 1                 | 5          | 0        | 37.9             |
| RMCA        | 96.037-M-5687 | 1                | 4          | 0        | 1                 | 4          | 0        | 0                | 5          | 0        | 0                 | 5          | 0        | 35.6             |
| RMCA        | 96.037-M-5691 | 1                | 4          | 1        | 0                 | 4          | 1        | 1                | 4          | 1        | 1                 | 4          | 1        | 32.8             |
| RMCA        | 96.037-M-5694 | 0                | 4          | 1        | 0                 | 4          | 0        | 0                | 4          | 1        | 0                 | 4          | 1        | 35.4             |
| RMCA        | 96.037-M-5700 | 1                | 4          | 1        | 0                 | 4          | 1        | 0                | 5          | 0        | 0                 | 5          | 0        | 32.7             |
| RMCA        | 96.037-M-5709 | 0                | 4          | 1        | 1                 | 4          | 1        | 0                | 5          | 0        | 0                 | 5          | 0        | 33.2             |
| RMCA        | 96.037-M-5716 | 1                | 4          | 0        | 1                 | 4          | 0        | 0                | 5          | 0        | 0                 | 5          | 0        | 32.6             |
| RMCA        | 96.037-M-5724 | 1                | 4          | 1        | 0                 | 5          | 1        | 1                | 4          | 1        | 0                 | 5          | 1        | 39.0             |
| RMCA        | 96.037-M-5725 | 1                | 4          | 1        | 0                 | 5          | 0        | 1                | 4          | 1        | 1                 | 5          | 0        | 33.0             |
| RMCA        | 96.037-M-5727 | 1                | 4          | 1        | 1                 | 3          | 1        | 1                | 4          | 1        | 1                 | 5          | 0        | 38.9             |
| RMCA        | 96.037-M-5736 | 1                | 4          | 0        | 1                 | 4          | 0        | 0                | 4          | 1        | 0                 | 4          | 1        | 35.3             |
| MNHN        | CG1892-1225   | 0                | 4          | 0        | 0                 | 4          | 0        | 0                | 4          | 0        | 0                 | 4          | 0        | 30.4             |
| MNHN        | CG1892-1226   | 1                | 4          | 0        | 1                 | 4          | 0        | 1                | 4          | 0        | 1                 | 4          | 0        | 31.3             |
| MNHN        | CG1893-38     | 1                | 4          | 0        | 1                 | 4          | 0        | 1                | 4          | 0        | 1                 | 4          | 0        | 33.2             |
| MNHN        | CG1893-40     | 1                | 4          | 0        | 0                 | 4          | 0        | 1                | 3          | 1        | 1                 | 3          | 1        | 27.3             |
| MNHN        | CG1893-41     | 1                | 4          | 0        | 1                 | 4          | 0        | 1                | 4          | 0        | 1                 | 4          | 0        | 30.5             |
| MNHN        | CG1893-42     | 0                | 4          | 1        | 0                 | 4          | 1        | 1                | 4          | 1        | 1                 | 4          | 1        | 30.8             |

**Table S2. Statistics on *Heliophobius* dentitions**

| Statistics             | Left lower teeth |            |          | Right lower teeth |            |          | Left upper teeth |            |          | Right upper teeth |            |          |
|------------------------|------------------|------------|----------|-------------------|------------|----------|------------------|------------|----------|-------------------|------------|----------|
|                        | Erupting         | Functional | Worn out | Erupting          | Functional | Worn out | Erupting         | Functional | Worn out | Erupting          | Functional | Worn out |
| Percentages            | 70.9             |            | 45.5     | 60.0              |            | 36.4     | 69.1             |            | 41.8     | 67.3              |            | 41.8     |
| Two functional teeth   |                  | 1.8        |          |                   | 1.8        |          |                  | 3.6        |          |                   | 1.8        |          |
| Three functional teeth |                  | 30.9       |          |                   | 25.5       |          |                  | 14.5       |          |                   | 21.8       |          |
| Four functional teeth  |                  | 58.2       |          |                   | 61.8       |          |                  | 58.2       |          |                   | 49.1       |          |
| Five functional teeth  |                  | 9.1        |          |                   | 10.9       |          |                  | 23.6       |          |                   | 27.3       |          |

**Table S3. Data concerning the jugal dentition of each *Georychus* specimen**

| Institution | Specimen    | Functional teeth | Erupting teeth | Skull length, mm |
|-------------|-------------|------------------|----------------|------------------|
| NHM         | 37.9.26.111 | P4               |                | 20               |
| MNHN        | 1988-111    | P4               | M1             | 22               |
| NHM         | 43.2.28.5   | P4-M1            |                | 27.9             |
| NHM         | 95.9.3.18   | P4-M1            | M2             | 32.3             |
| NHM         | 859b        | P4-M1-M2         |                | 33.9             |
| NHM         | 859e        | P4-M1-M2         |                | 36.7             |
| NHM         | 95.9.3.15   | P4-M1-M2         |                | 34.3             |
| NHM         | 95.9.3.14   | P4-M1-M2         |                | 33.7             |
| MNHN        | 1988-112    | P4-M1-M2         |                | 38.3             |
| NHM         | 46.11.18.46 | P4-M1-M2         | M3             | 39.4             |
| NHM         | 43.2.28.4   | P4-M1-M2         | M3             | 33.7             |
| NHM         | 859c        | P4-M1-M2         | M3             | 39               |
| NHM         | 95.9.3.16   | P4-M1-M2-M3      |                | 39.4             |
| NHM         | 66.6.16.2   | P4-M1-M2-M3      |                | —                |
| MNHN        | 1988-113    | P4-M1-M2-M3      |                | 49.1             |
